# 1 Dendritic growth and synaptic organization 2 from activity-independent cues and local 3 activity-dependent plasticity

4 Jan H. Kirchner<sup>1,2†\*</sup>, Lucas Euler<sup>2†</sup>, Julijana Gjorgjieva<sup>1,2\*</sup>

\*For correspondence:

[kirchner.jan@icloud.com](mailto:kirchner.jan@icloud.com);

[gjorgjieva@tum.de](mailto:gjorgjieva@tum.de)

†These authors contributed  
equally to this work

5 <sup>1</sup>School of Life Sciences, Technical University of Munich, Freising, Germany;  
6 <sup>2</sup>Computation in Neural Circuits Group, Max Planck Institute for Brain Research,  
7 Germany

---

8  
9 **Abstract** Dendritic branching and synaptic organization shape single neuron and network  
10 computations. How they emerge simultaneously during brain development as neurons become  
11 integrated into functional networks is still not mechanistically understood. Here, we propose a  
12 mechanistic model in which dendrite growth and the organization of synapses arise from the  
13 interaction of activity-independent cues from potential synaptic partners and local  
14 activity-dependent synaptic plasticity. Consistent with experiments, three phases of dendritic  
15 growth – overshoot, pruning, and stabilization – emerge naturally in the model. The model  
16 generates stellate-like dendritic morphologies capturing several morphological features of  
17 biological neurons under normal and perturbed learning rules, reflecting biological variability.  
18 Model-generated dendrites have approximately optimal wiring length consistent with  
19 experimental measurements. Besides setting up dendritic morphologies, activity-dependent  
20 plasticity rules organize synapses into spatial clusters according to the correlated activity they  
21 experience. We demonstrate that a trade-off between activity-dependent and -independent  
22 factors influences dendritic growth and synaptic location throughout development, suggesting  
23 that early developmental variability can affect mature morphology and synaptic function.  
24 Therefore, a single mechanistic model can capture dendritic growth and account for the synaptic  
25 organization of correlated inputs during development. Our work suggests concrete mechanistic  
26 components underlying the emergence of dendritic morphologies and synaptic formation and  
27 removal in function and dysfunction, and provides experimentally testable predictions for the  
28 role of individual components.

---

## 30 Introduction

31 The dendrites of a neuron are intricately branched structures that receive electrochemical stim-  
32 ulation from other neurons. The morphology of dendrites determines the location of synaptic  
33 contacts with other neurons and thereby constrains single-neuron computations. During devel-

34 opment, the dendrites of many neurons grow simultaneously and become integrated into neural  
35 circuits. Dendrite development is highly dynamic; iterated addition and retraction of branches al-  
36 low these dendrites to probe various potential synaptic partners before stabilizing (*Cline, 2016*;  
37 *Richards et al., 2020*). Many intrinsic and extrinsic factors underlie the dynamics of dendritic devel-  
38 opment. In any given neuron, intrinsic expression of specific genes controls many morphological  
39 aspects, including the orientation of the dendrite in the cortex, the general abundance of dendritic  
40 branching, and the timing of growth onset (*Puram and Bonni, 2013*). Extrinsic signaling, in con-  
41 trast, exerts precise control over the detailed dynamics of dendrite development via various mech-  
42 anisms, including activity-dependent cell-to-cell interactions and molecular signaling (*Polleux et al.,*  
43 *2016*).

44 While many signaling molecules affect dendrite development, the brain-derived neurotrophic  
45 factor (BDNF) and its immature predecessor proBDNF are particularly crucial in the central nervous  
46 system (*Lu et al., 2005*). While exposure to BDNF leads to larger dendrites with a higher density  
47 of synapses (*McAllister et al., 1995; Tyler and Pozzo-Miller, 2001*), exposure to proBDNF leads to  
48 smaller dendrites with fewer synapses (*Koshimizu et al., 2009; Yang et al., 2014*). Furthermore,  
49 the precise balance of BDNF and proBDNF is essential for the organization of synapses into clus-  
50 ters during development (*Kirchner and Gjorgjieva, 2021; Winnubst et al., 2015; Kleindienst et al.,*  
51 *2011; Niculescu et al., 2018*). Interestingly, synaptic activity triggers the cleaving of proBDNF into  
52 BDNF (*Je et al., 2012*), providing a mechanistic link between the molecular factors driving dendrite  
53 maturation and neural activity.

54 Activity-dependent factors are equally important in driving dendritic growth. As the sensory pe-  
55 riphery is immature during early postnatal development, when many dendrites grow (*Leighton and*  
56 *Lohmann, 2016*), many developing circuits generate their own spontaneous activity. The rich spa-  
57 tiotemporal structure of spontaneous activity instructs the formation, removal, and change in the  
58 strength of synaptic inputs (*Sretavan et al., 1988; Sakai, 2020*) and triggers the stabilization or re-  
59 traction of entire dendritic branches (*Riccomagno and Kolodkin, 2015; Lohmann et al., 2002*). While  
60 blocking spontaneous activity does not result in grossly different dendrite morphology, the density  
61 and specificity of synaptic connections are strongly perturbed (*Campbell et al., 1997; Ultanir et al.,*  
62 *2007*), highlighting the instructive effect of spontaneous activity on dendritic development (*Crair,*  
63 *1999*).

64 One influential hypothesis tying together the extrinsic signaling factors underlying dendritic de-  
65 velopment is the synaptotrophic hypothesis (*Vaughn, 1989*). According to this hypothesis, a grow-  
66 ing dendrite preferentially extends into regions where it is likely to find synaptic partners. Once  
67 a dendrite finds such a partner, a synaptic contact forms, anchors the developing dendrite, and  
68 serves as an outpost for further dendritic growth. Conversely, loss of synaptic input to the dendrite  
69 can lead to retraction unless the remaining synapses stabilize the branch (*Lohmann et al., 2002*;  
70 *Niell et al., 2004; Haas et al., 2006; Cline and Haas, 2008; Riccomagno and Kolodkin, 2015; Cline,*  
71 *2016*). However, elaborate dendrites with morphologically defined synapses can also emerge with-  
72 out any synaptic transmission (*Verhage et al., 2000; Cijssouw et al., 2014*), suggesting that synaptic  
73 activity influences dendritic growth but is not the only driving force. Despite the significant inter-  
74 est in the synaptotrophic hypothesis, we still lack a mechanistic understanding of how activity-

75 dependent and -independent factors combine to shape development.

76 To investigate interactions between known signaling factors and to synthesize information from  
77 different experimental results, computational models of dendrite development provide a fruitful di-  
78 rection to explore how different mechanisms can generate realistic dendritic morphologies (*Cuntz*,  
79 *2016*). Previous approaches include modeling dendritic development with random branching (*Klie-*  
80 *mann, 1987*) or as a reaction-diffusion system (*Luczak, 2006*), implementing activity-independent  
81 growth cones that sense molecular gradients (*van Veen and van Pelt, 1992; Torben-Nielsen and*  
82 *De Schutter, 2014*), or constructing dendrites as the solution to an optimal wiring problem (*Cuntz*  
83 *et al., 2010*). While these approaches can generate dendrites that accurately match the statistics of  
84 developing and mature biological dendrites (*Koene et al., 2009; Cuntz, 2016*), they provide limited  
85 insight into how dendritic growth interacts with synapse formation and local activity-dependent  
86 organization of synaptic inputs, hence obscuring the link between morphological variability and  
87 electrophysiological (*Gouwens et al., 2020; Scala et al., 2021*) or functional (*Poirazi and Mel, 2001;*  
88 *Poirazi et al., 2003; Park et al., 2019; Poirazi and Papoutsis, 2020*) synaptic and dendritic properties.

89 Here, we propose a mechanistic computational model for cortical dendritic development for  
90 dendrite growth and synapse formation, stabilization and elimination based on reciprocal interac-  
91 tions between activity-independent growth signals and spontaneous activity. Starting from neu-  
92 ronal somata distributed in a flat sheet of cortex, spatially distributed potential synapses drive the  
93 growth of stellate-like dendrites through elongation and branching by activity-independent cues.  
94 Upon contact, synaptic connections form and stabilize or disappear according to a local activity-  
95 dependent learning rule inspired by neurotrophin interactions based on correlated patterns of  
96 spontaneous activity (*Kirchner and Gjorgjieva, 2021*). Consistent with the synaptotrophic hypoth-  
97 esis, the stability of a dendritic branch depends on the stability of its synaptic contacts, with the  
98 branch likely retracting after substantial synaptic pruning. The resulting dynamic system naturally  
99 leads to the emergence of three distinct phases of dendrite development: 1) an initial overshoot  
100 phase characterized by dendrite growth and synapse formation, 2) a pruning phase during which  
101 the learning rule prunes poorly synchronized synapses, and 3) a stabilization phase during which  
102 morphologically stable dendrites emerge from the balancing of growth and retraction. Varying  
103 model parameters in biologically realistic ranges produces dendrite length and synapse density  
104 changes consistent with experiments. Our mechanistic model generates dendrites with approx-  
105 imately optimal wiring length, which is a widely used criterion for evaluating dendritic morphol-  
106 ogy (*Cuntz et al., 2010, 2012; Chklovskii et al., 2002*). At the same time, the model leads to the  
107 activity-dependent emergence of functional synaptic organization and input selectivity. Therefore,  
108 our mechanistic modeling framework for the growth and stabilization of dendritic morphologies  
109 and the simultaneous synaptic organization according is ideally suited for making experimental  
110 predictions about the effect of perturbing specific model components on the resulting dendritic  
111 morphologies and synaptic placement.

## 112 Results

113 We built a computational model of activity-dependent dendrite growth during development based  
114 on synapse formation, stabilization, and elimination. We focused on basal stellate-like dendrites

115 of cortical pyramidal neurons, which primarily extend laterally within a layer of the cortex (*Lark-*  
116 *man and Mason, 1990*) and receive numerous feedforward and recurrent inputs (*Rossi et al., 2019;*  
117 *Iacaruso et al., 2017*). Stellate morphologies are found in many types of neurons, especially in  
118 the somatosensory cortex, including interneurons and layer 4 spiny stellate cells, which are the  
119 main recipients of thalamic inputs and play a key role in sensory processing (*Schubert et al., 2003;*  
120 *Marques-Smith et al., 2016; Scala et al., 2019*). To investigate the impact of synapse formation  
121 on dendrite development, we modeled several neuronal somata and potential synapses in a flat  
122 sheet of cortex (*Figure 1a*). Potential synapses represent locations in the cortex where an axon  
123 can form a synapse with a nearby dendrite (*Stepanyants and Chklovskii, 2005*). The model con-  
124 sists of two components: An activity-independent component that directly governs branch growth  
125 and retraction; and an activity-dependent component that governs synaptic organization and thus  
126 indirectly affects branch stability. Inspired by the synaptotrophic hypothesis (*Vaughn, 1989*), we  
127 mimicked the effect of activity-independent molecular signaling by letting each potential synapse  
128 release diffusive signaling molecules that attract the growing dendrite (*Figure 1b, Figure 1–Figure*  
129 *Supplement 1, Figure 1–Figure Supplement 2*). In addition, during development and before the on-  
130 set of sensory experience, neural circuits generate patterned spontaneous activity (*Blankenship*  
131 *and Feller, 2010; Ackman and Crair, 2014*). Therefore, to model the structured spontaneous ac-  
132 tivity exhibited by different axons (*Scholl et al., 2017; Iacaruso et al., 2017*), we divided potential  
133 synapses randomly into different activity groups that receive inputs correlated within a group but  
134 uncorrelated between groups (see Methods). Each group represents either synapses from the  
135 same presynaptic neuron or from neurons that experience correlated presynaptic activity.

Because of their attraction to growth-factor releasing synapses and independent of neural ac-  
tivity, dendrites in our model grow outward from the soma towards the nearest potential synapse,  
where they form a synapse and temporarily stabilize (*Figure 1b, Figure 1–Figure Supplement 2*).  
We assumed that dendrites could not overlap based on experimental data (*Grueber and Sagasti,*  
*2010*); therefore, dendrites in the model retract, for instance, when further growth would require  
self-overlap. Once a synapse is formed, we modeled that its strength changes according to a lo-  
cal, activity-dependent plasticity rule (*Kirchner and Gjorgjieva, 2021*) (*Figure 1c*). The learning rule  
induces synaptic potentiation whenever presynaptic and local postsynaptic activity co-occur, and  
synaptic depression whenever local postsynaptic activity occurs in the dendrite independent of  
presynaptic stimulation, usually due to the activation of a neighboring synapse (see Methods and  
the ‘offset’ constant below),

$$\Delta\text{weight} = \text{post} \times (\text{pre} - \text{offset}). \quad (1)$$

136 As shown previously, this rule generates synaptic distance-dependent competition, where nearby  
137 synapses affect each other more than distant synapses, and correlation-dependent cooperation,  
138 where neighboring synchronized synapses stabilize. In contrast, neighboring desynchronized synapses  
139 depress (*Kirchner and Gjorgjieva, 2021*). In our model, we assumed that when a synapse depresses  
140 below a threshold, it decouples from the dendrite, and the corresponding branch retracts succes-  
141 sively to either the nearest stable synapse, branch point, or the soma (*Figure 1b, Figure 1–Figure*  
142 *Supplement 2*). After removal, the vacated synapse turns into a potential synapse again, attract-

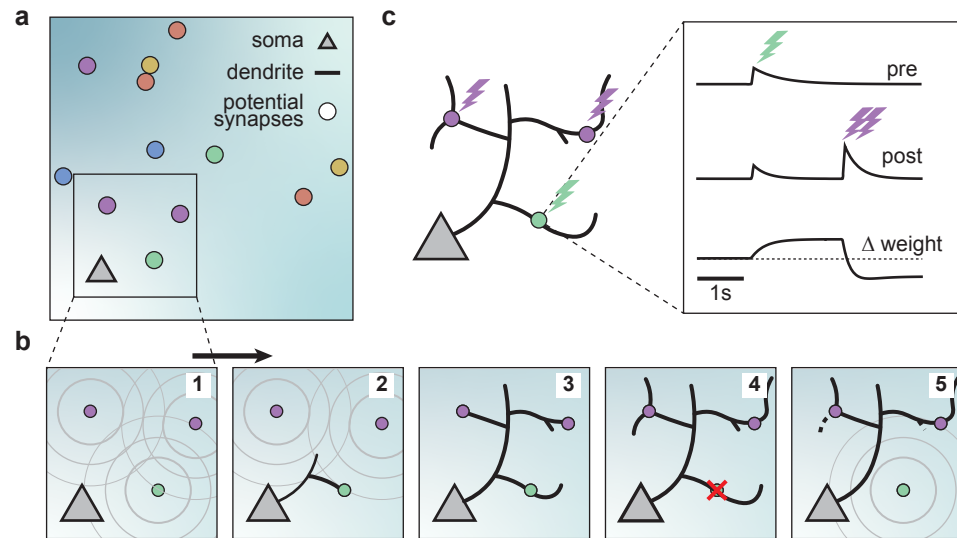

**Figure 1. A model of dendritic growth for a cortical pyramidal neuron driven by activity-independent and -dependent mechanisms.** (a) Schematic of the soma of a pyramidal neuron (orange triangle) with 12 randomly distributed potential synapses from presynaptic axons (circles) with correlated activity patterns indicated by color. (b) Schematic of activity-independent and -dependent mechanisms. Soma and synapses correspond to box in a. Signaling molecules diffusing from potential synapses (1) attract dendrite growth and promote synapse formation (2) independent of firing pattern (3). Over time, poorly synchronized synapses depress and are pruned from the dendrite (4), while well-synchronized synapses remain stable (5). After a branch retracts, the dendrite is less sensitive to the growth field at that location (5). (c) Change in weight of one synapse (green) following the stimulation of itself (green bolt) and of two nearby synapses (purple bolts). Left: Schematic of the developing dendrite from b with bolts indicating synaptic activation. Right: Presynaptic accumulator (top), postsynaptic accumulator (middle), and change in synaptic weight (bottom) as a function of time (see Methods *Kirchner and Gjorgjieva (2021)* for details of the plasticity rule). Dashed line (bottom) indicates zero change.

**Figure 1-Figure supplement 1.** The growth field is similar to two-dimensional heat diffusion.

**Figure 1-Figure supplement 2.** Detailed illustration of the dendritic growth mechanism.

143 ing other growing branches. Thus, a developing dendrite in our model acquires its arborization  
144 through the attraction to signaling molecules released by potential synapses and the repeated  
145 activity-dependent formation, stabilization and removal of synapses.

### 146 **Dendrite development through balancing growth and retraction**

147 After specifying the rules governing the growth of individual dendritic branches, we investigated  
148 dendritic development on long timescales. When growing dendrites according to our proposed  
149 growth rule based on signaling molecules attraction and spontaneous activity-dependent synap-  
150 tic refinements (**Figure 1**), we found that dendrites form several stems, i.e. branches which start  
151 directly at the soma, and rapidly expand outwards (**Figure 2a**). After an initial phase of rapid expan-  
152 sion, we observed that growth rapidly attenuates, and the dendritic length stabilizes (**Figure 2b**).  
153 This stability is achieved when the dendrite's expansion and retraction are balanced (**Figure 2c**). To  
154 investigate whether the stability in total length also corresponds to stability in dendritic morphol-  
155 ogy, we quantified morphological stability as the pixel-wise correlation of a dendrite with itself  
156 4.5 hours earlier, which is several orders of magnitude larger than the speed at which dendrites  
157 grow and retract in our model (see Table 1). Despite the residual amount of expansion and re-  
158 traction, we showed that morphological stability increases rapidly, and the dendritic morphology  
159 is already stable after the initial expansion phase (**Figure 2d**). Interestingly, such rapid stabiliza-  
160 tion of morphology has also been observed in the mouse visual cortex (**Richards et al., 2020**) and  
161 the *Drosophila* larvae (**Castro et al., 2020**). We next quantified the Sholl diagram, the number of  
162 dendritic branches at a given distance from the soma, commonly used as a measure of dendritic  
163 complexity (**Sholl, 1953; Binley et al., 2014; Bird and Cuntz, 2019**). The Sholl diagram of the stabi-  
164 lized dendrites generated by our model is unimodal and qualitatively matches the Sholl diagram  
165 of developing basal dendrites from the mouse medial prefrontal cortex (**Figure 2e**; data extracted  
166 from ref. **Kroon et al., 2019**, postnatal days 6-8), as well as the hippocampus (**Kleindienst et al.,**  
167 **2011**). In summary, by combining activity-independent and -dependent dendritic growth mecha-  
168 nisms, our model produces dendrites that rapidly expand and stabilize by balancing growth and  
169 retraction.

### 170 **Delayed activity-dependent plasticity produces a rapid increase of synapse density** 171 **followed by pruning**

172 Since our model couples dendritic growth to the formation and removal of synapses (**Figure 3a**), we  
173 next investigated how the number of connected synapses, which are necessary for the dendrite's  
174 stabilization, changes over time. As a result of the dendrite's rapid growth, we observed a rapid in-  
175 crease in the number of connected synapses (**Figure 3b,c**). In contrast to the dendrite's length, we  
176 found that the initial rapid increase in connected synapses is followed by a brief period of an over-  
177 all reduction of the number of synapses before additions and removals are balanced (**Figure 3c**).  
178 This removal of established synapses resembles the postnatal removal of synapses observed in  
179 the mouse neocortex (**Holtmaat et al., 2005**). To understand how the initial overshoot and sub-  
180 sequent removal of synapses emerge in our model, we computed the average synaptic weight of  
181 all synapses that eventually stabilize or are pruned (**Figure 3d**). We found that the delayed onset

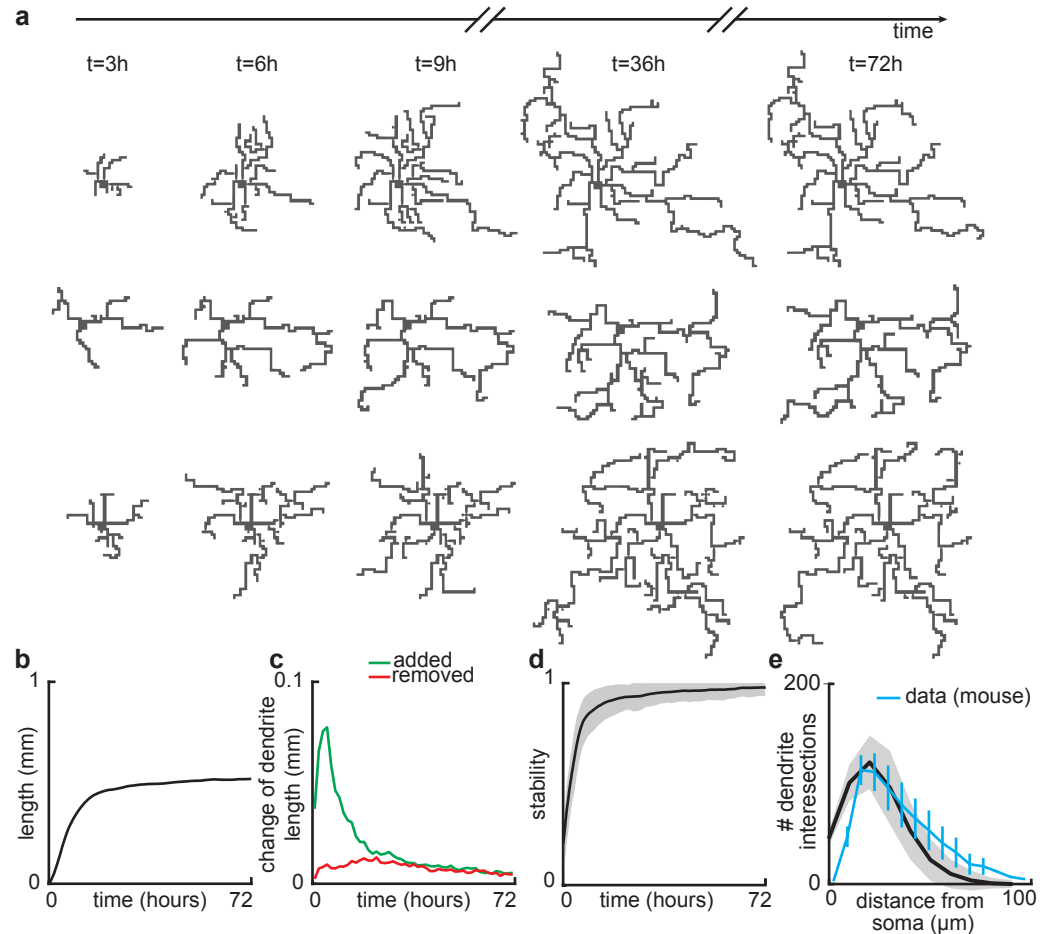

**Figure 2. Balanced growth and retraction generate morphologically stable dendrites.** (a) Three example dendrites at five time points from our simulations. For clarity of presentation, connected synapses are not displayed. (b) Total length of dendritic tree as a function of time. (c) Length of dendrite added (green) and removed (red) as a function of time. (d) Morphological stability (correlation between the dendrite shape at time  $t$  and  $t - 4.5$  hours) as a function of time. (e) Average number of dendrite intersections as a function of distance from the soma (the Sholl diagram). Data from basal dendrites in the developing mouse medial prefrontal cortex superimposed, normalized to the maximum (blue; ref. (Kroon *et al.*, 2019)). All lines represent averages across 32 simulations with nine dendrites each. Shaded area indicates two standard deviations.

**Figure 2-video 1.** Example of a simulation in which several dendrites develop in parallel.



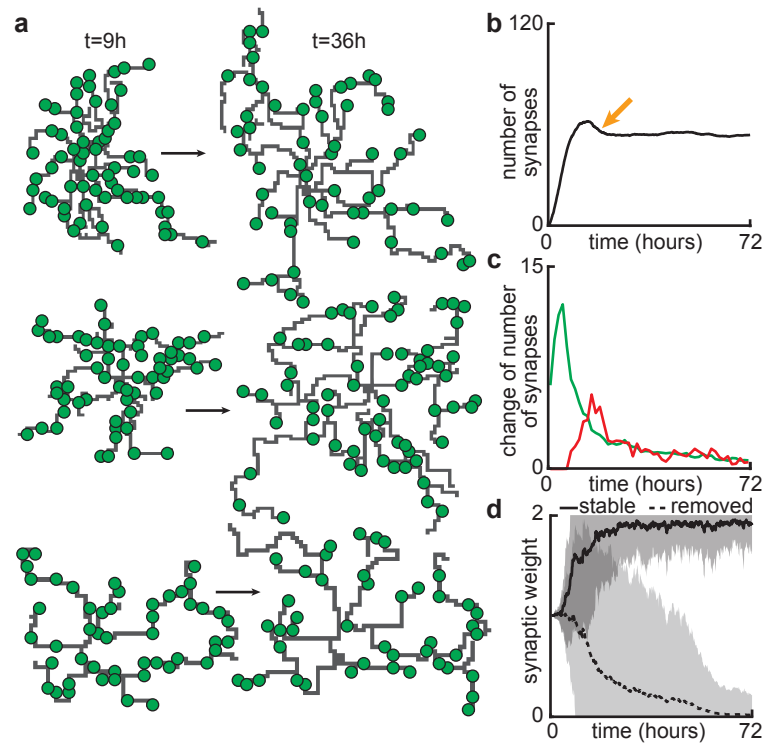

**Figure 3. Synapse formation and removal predominate in distinct phases of dendrite development.** (a) Three examples of dendrites at the beginning ( $t = 9$  hours) and end ( $t = 72$  hours) of the simulation. Green circles indicate formed synapses. (b) Total number of connected synapses as a function of time. Orange arrow highlights overshoot and subsequent pruning. (c) Added (green) and pruned synapses (red) as a function of time. (d) Average synaptic weights of synapses that ultimately stabilize (solid black; final weight more than 0.5) or are removed (dashed black; final weight less than 0.5) as a function of time. All lines represent averages across 32 simulations with nine dendrites each. Shaded area indicates two standard deviations.



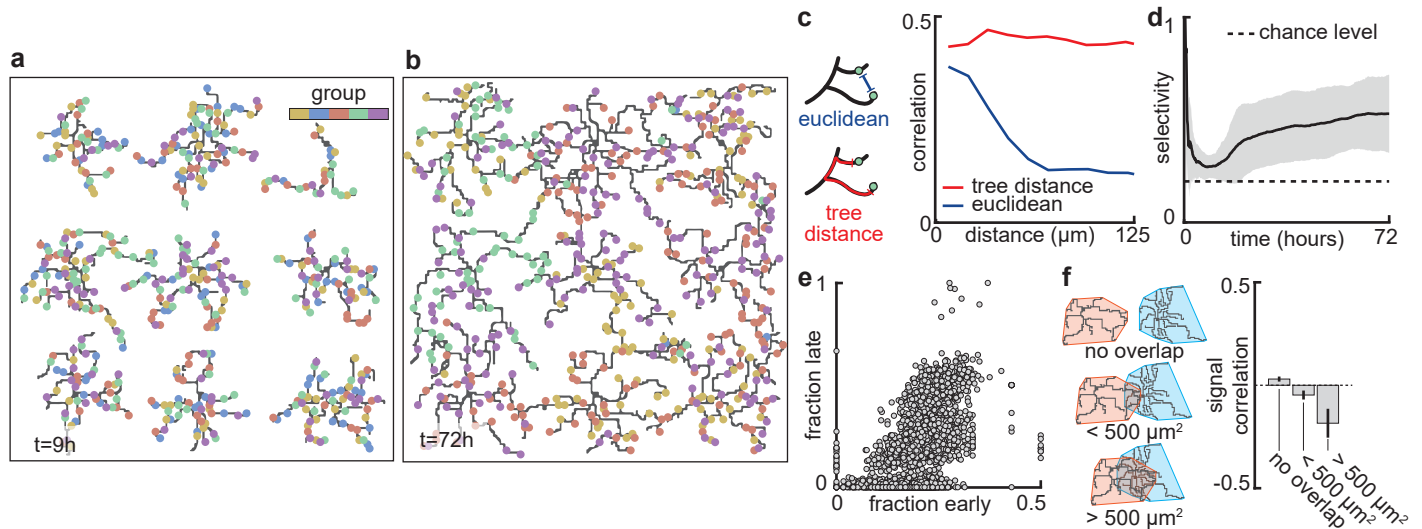

**Figure 4. Stable morphology is obtained through selective removal of synapses and dendritic input selectivity.** (a,b) Dendritic trees before (a, 9 hours) and after (b, 72 hours) removal of synapses (Figure 3). Connected synapses colored corresponding to activity group, which represents activity correlations (Figure 1b). (c) Left: Schematic illustrating the difference between Euclidean and tree distance. Note that we compute the Euclidean distance between synapses from different trees. Right: Correlation between pairs of synapses as a function of the Euclidean distance (blue) and tree distance (red). (d) Input selectivity of dendrites (defined as the fraction of the activity group with the highest representation) as a function of time. Dashed line indicates chance level. All lines represent averages across 32 simulations with nine dendrites each. Shaded area indicates two standard deviations. (e) Fraction of connected synapses per activity group early ( $t = 9$  hours) and late ( $t = 72$  hours) in the simulation. Each dot represents one of the five activity groups on one of the nine dendrites from the 32 simulations, resulting in  $5 \times 9 \times 32 = 1440$  data points. (f) Left: Schematic of different levels of overlap (rows) between the convex hulls of two dendrites, referring to the smallest convex sets that contain the dendrite. Right: Signal correlation (correlation between fractions of synapses from the same activity groups) for different levels of dendritic overlap. Error bars indicate the standard error of the mean, computed from 1152 pairs of dendrites from 32 simulations.

182 of synapse removal (Figure 3c) is due to the slow time scale of the synaptic weight compared to  
 183 the faster time scale of dendrite growth. Thus, the initial overshoot and subsequent removal of  
 184 synapses observed in our model (Figure 3b) is due to the rapid formation relative to the delayed  
 185 activity-dependent elimination of synapses.

### 186 Activity-dependent competition between synapses produces input selectivity and 187 synaptic organization

188 Next, we asked if the stabilization of dendrites might be supported by the emergence of organiza-  
 189 tion of connected synapses. First, we compared the synapses connected to dendrites at the apex  
 190 of the overshoot phase (peak in Figure 3b) with those in the stabilization phase (Figure 4a,b). While  
 191 dendrites at the apex do not prefer synapses from any particular input group, in the stabilization  
 192 phase, they acquire a preference for synapses from only two or three of the activity groups (Fig-  
 193 ure 1b). These dynamics resemble the activity-dependent synaptic competition in the developing  
 194 visual cortex, where asynchronously activated synapses tend to depress (Winnubst et al., 2015).  
 195 Notably, the remaining synchronized synapses in our model experience correlation-dependent  
 196 cooperation (Kirchner and Gjorgjieva, 2021), and are therefore able to stabilize the dendrite and  
 197 prevent the total retraction of all branches.

198 This selective potentiation of synapses according to input correlation also leads to dendritic  
199 selectivity for inputs. In particular, synapses on the same dendrite are likely to come from the same  
200 activity group (**Figure 4c**). This selectivity is acquired throughout the simulation, where selectivity  
201 starts high (a nascent dendrite is trivially selective to its first synapse;  $t = 0 - 1$  hours), drops almost  
202 to chance level (indiscriminate addition of synapses;  $t = 9$  hours), and finally approaches a value  
203 of  $\frac{1}{2}$  (two activity groups per dendrite remain after the pruning phase;  $t = 72$  hours) (**Figure 4d**). To  
204 determine which activity group stabilizes eventually, we computed selectivity for each group early  
205 ( $t = 9$  hours) and late ( $t = 72$  hours). We found that early high (low) selectivity for an activity group  
206 translates into even higher (lower) selectivity in the stable state (**Figure 4e**), predicting an outsized  
207 impact of early synaptic contacts on continued dendritic function. Finally, we observed that when  
208 dendritic trees overlap strongly, they tend to be selective to different activity groups (**Figure 4f**) due  
209 to competition for limited potential synapses of any given group. Interestingly, also in the mouse  
210 visual cortex, neighboring neurons often exhibit different selectivity (**Ohki et al., 2005**), potentially  
211 reflecting a lasting impact of early competition between different inputs.

212 In summary, the emergence of dendrites' selectivity for synapses from specific activity groups  
213 coincides with and supports the stabilization of dendritic morphologies.

#### 214 **Balance of mature and immature brain-derived neurotrophic factor controls ar-** 215 **borization of dendrites**

216 After establishing that our model can capture some important aspects of the dynamics of den-  
217 dritic development through the combination of activity-independent and activity-dependent mech-  
218 anisms, including local plasticity, we asked how changing properties of the plasticity rule might af-  
219 fect dendritic growth and synaptic organization. Developmentally, the interaction between two  
220 neurotrophic factors, BDNF and proBDNF (**Figure 5a**), has been found to play a key role in or-  
221 ganization of synaptic inputs into clusters (**Niculescu et al., 2018**). Therefore, through the previ-  
222 ously established link between this neurotrophin interaction and synaptic plasticity (**Kirchner and**  
223 **Gjorgjieva, 2021**), we investigated the influence of changing the underlying molecular interactions  
224 on dendritic morphology.

225 As we have previously shown, the "offset" term in our plasticity rule (**Equation 1**) represents  
226 the neurotrophin balance (computed as  $\text{BDNF}/(\text{BDNF}+\text{proBDNF})$ ) released upon stimulation of a  
227 synapse (**Kirchner and Gjorgjieva, 2021**). Consequently, we found that an overabundance of BDNF  
228 (proBDNF) leads to potentiation (depression) of the synapse (**Figure 5b**), consistent with experi-  
229 mental data (**Lu et al., 2005**). Furthermore, our plasticity rule acts locally on the dendrite so that  
230 the strength of individual synapses is affected by interactions with other nearby synapses. Con-  
231 cretely, a lower (higher) density of nearby synapses tends to lead to potentiation (depression) of  
232 the synapse (**Kirchner and Gjorgjieva, 2021**).

233 To better understand the interactions between the balance of neurotrophins and the density  
234 of synapses, we analytically derived the maximum density of synapses that can stabilize given a  
235 balance of neurotrophins (**Figure 5c**, see Methods). We found that an overabundance of BDNF  
236 (proBDNF) leads to a higher (lower) maximal density of synapses (**Figure 5c**). Indeed, when we  
237 simulated dendritic development with varying neurotrophin ratios, we found that the density of

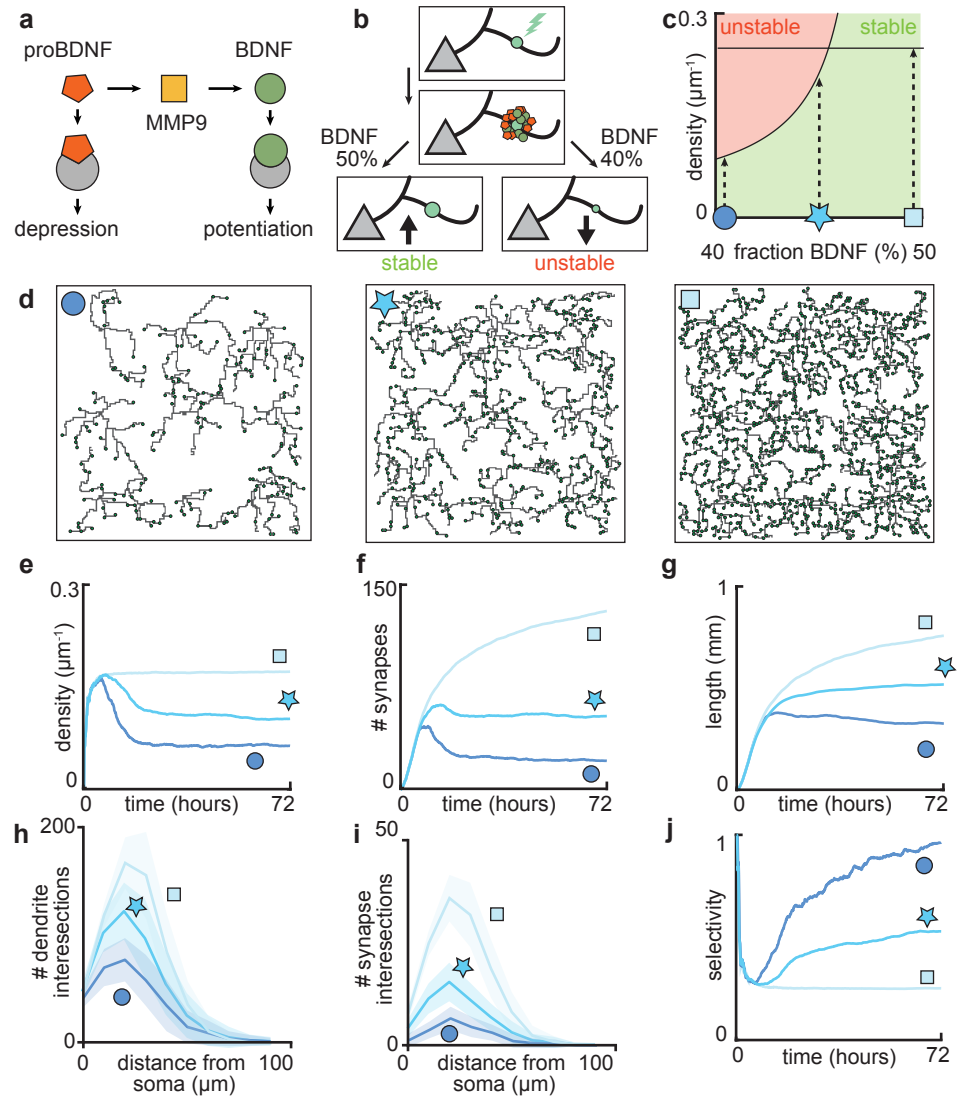

**Figure 5. Dendritic arborization is controlled by the ratio of neurotrophic factors.** (a) Interactions between molecular factors underlie a local activity-dependent plasticity rule for synaptic change (Equation 1, (Kirchner and Gjorgjieva, 2021)). Neurotrophins (BDNF and proBDNF) bind to different neurotrophin receptors, and a cleaving protease (MMP9) converts proBDNF to BDNF in an activity-dependent manner. (b) Schematic illustrating the impact of different concentrations of BDNF on synaptic change. Upon stimulation of a synapse (top), proBDNF and BDNF is released into extracellular space (middle), where proBDNF can be cleaved into BDNF by MMP9. Depending on the neurotrophin ratio, computed as  $\text{BDNF}/(\text{BDNF} + \text{proBDNF})$ , the synapse is stabilized (left) or depressed and hence eventually removed (right). (c) Maximally possible stable density of synapses as a function of the initial concentration of BDNF. Stable (no pruning; green) and unstable (pruning occurs; red) areas are indicated. (d) Three examples of dendrites with superimposed synapses (green) with high initial BDNF concentration (49%), the baseline concentration (45%, same as Figure 1-Figure 3) and low initial BDNF (40%). Symbols correspond to locations marked in panel c. (e-g) Averages for density of synapses on the dendrite (e), number of connected synapses (f) and total length of dendrite (g) as a function of time for dendrites from the three conditions shown in d. (h-i) Average number of dendrite intersections (h) and synapses (i) as a function of distance from the soma for dendrites from the three conditions shown in d. (j) Global selectivity as a function of time for dendrites from the three conditions shown in d. All lines represent averages across 32 simulations with nine dendrites each.

238 synapses per dendrite increases with increasing neurotrophin ratio (**Figure 5d,e**). Consistent with  
239 biological evidence (**McAllister et al., 1995; Tyler and Pozzo-Miller, 2001**), in our model, developing  
240 dendrites treated with BDNF tend to grow larger and have a higher density of synapses (**Figure 5e,g**).  
241 In contrast, over-expression of proBDNF leads to smaller dendrites with fewer synapses (**Koshimizu**  
242 **et al., 2009; Yang et al., 2014**) (**Figure 5f,g**). Perturbing the balance between neurotrophins scales  
243 the Sholl diagram of dendrite intersections and synapses, but does not qualitatively affect the  
244 shape of the curve (**Figure 5h,i**).

245 In our model, these changes in length and density are explained by a change in selectivity of  
246 synapses (**Figure 5j**). Concretely, an increase in BDNF erases all synaptic competition, reducing  
247 the selectivity to chance level, while an increase in proBDNF greatly amplifies synaptic competition  
248 and thus selectivity. These differences in competition determine the number of pruned synapses  
249 and thus the length at which the dendrite stabilizes. Thus, our model predicts that biologically-  
250 relevant differences in dendritic morphology may arise from different neurotrophin ratios due to  
251 the maximal density of synapses that stabilizes the dendrite.

## 252 **Different impacts of activity-dependent and -independent factors on dendritic de-** 253 **velopment**

254 Our mechanistic model enabled us to dissect the different roles of activity-dependent and -independent  
255 mechanisms on dendritic morphology. To this end, we varied either only activity-dependent fac-  
256 tors or only activity-independent factors across a set of simulations (**Figure 6a**). We introduced  
257 variability in the activity-dependent aspects of the model through the firing patterns of potential  
258 synapses, and in the activity-independent aspects of the model via fluctuations in both the extrinsic  
259 growth signals and the intrinsic mechanisms underlying dendrite growth (see Methods, **Figure 6b**).

260 Consistent with experiments (**Scala et al., 2021**), dendrites produced by our model exhibit sub-  
261 stantial variability in morphology (**Figure 6a**), length (**Figure 6c**), and number of synapses (**Figure 6d**).  
262 Comparing dendrites that experienced either identical activity-dependent or -independent factors  
263 allowed us to compute the percentage of change in morphology attributable to each factor as a  
264 function of developmental time (**Figure 6e,f**). We found that while activity-independent factors  
265 tend to lead to large differences in morphology early on, activity-dependent factors affect dendrite  
266 morphology with a substantial delay. These differences can be explained by the delay in synaptic  
267 pruning relative to initial synaptic formation (**Figure 3d**).

268 Despite substantial variability, there are predictive factors for the final length of the dendrite. In  
269 particular, we found a positive relationship between the number of major branches, i.e. branches  
270 starting from the soma, and the final length (**Figure 6g**). Interestingly, this is consistent with re-  
271 constructed dendrites from multiple regions of the mouse cortex (**Figure 6–Figure Supplement 1**).  
272 Furthermore, our model predicts that dendrites that have a high (low) total length early on will, on  
273 average, retain a (high) low total length throughout development (**Figure 6e**).

274 Thus, our model suggests that while activity-independent factors affect dendritic morphology  
275 early on during development, activity-dependent factors dominate later. Properties like the num-  
276 ber of major branches or the length of dendrites during early development might be predictive of  
277 the dendrite's morphology throughout the animal's lifetime.

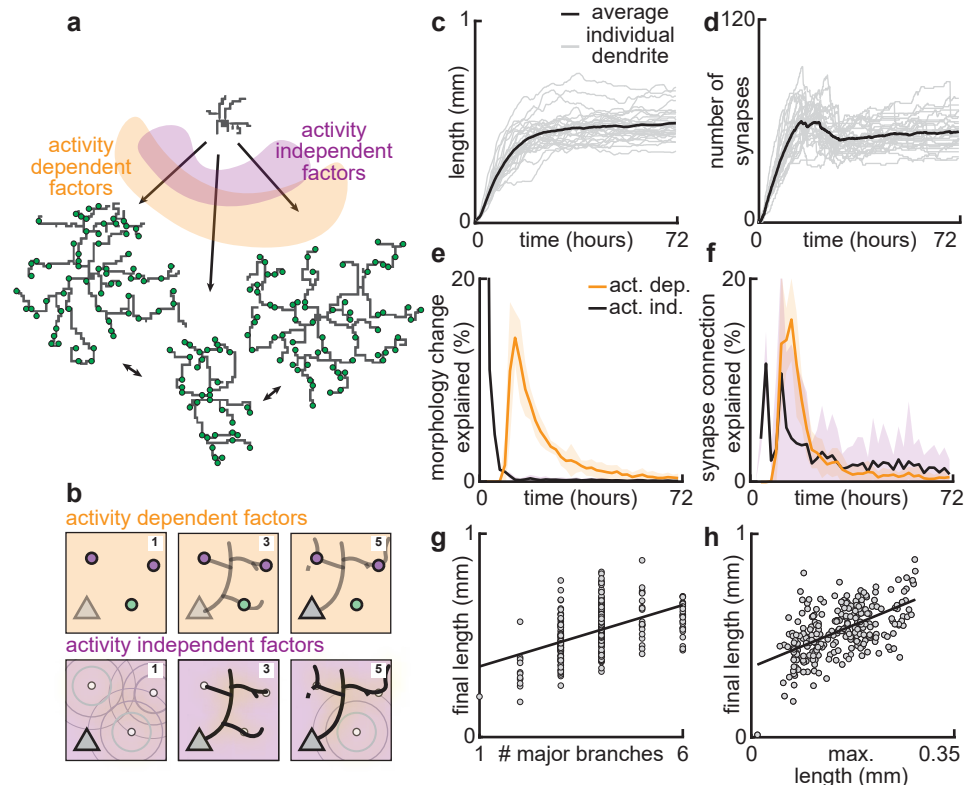

**Figure 6. Morphological variability emerges from the interaction of activity-dependent and -independent factors.** (a) Example of three dendrites with identical initial conditions but different random seeds. The colors illustrate that initial growth is governed by activity-independent factors, while later growth is governed by activity-dependent factors. (b) Schematic illustrating how variability is introduced into model: activity-dependent via the patterns of spontaneous activity (orange), and activity-independent via fluctuations in both the extrinsic growth stimulating field (purple 1) and the intrinsic mechanisms underlying dendrite growth (purple 2; see Methods). (c,d) Total length (c) and number of synapses (d) as a function of time for dendrites with identical initial conditions but different random seeds. Each gray line corresponds to one dendrite from one of 32 simulations. Bold line represents average. (e,f) Percentage in change of morphological similarity (e) and similarity of connected synapses (f) as a function of time for simulations where activity-dependent (orange) or -independent (purple) factors vary. Lines represent averages across 32 simulations with nine dendrites each. Shaded area indicates two standard deviations. (g,h) Final length as a function of number of major branches (g) and maximal length in the first 18 hours of the simulation (h). Lines indicate linear regression.

**Figure 6-Figure supplement 1.** Total tree length increases with the number of stems.

## 278 **Coupled dendrite growth and synapse formation leads to approximately optimal** 279 **wiring**

280 Since space is limited in the cortex and maintaining complex morphologies is costly, it is beneficial  
281 for a neuron to connect to its synapses with the minimum possible dendrite length (*Cuntz et al.,*  
282 *2012*) (*Figure 7a*). In our model, dendrites are assumed to grow towards the nearest potential  
283 synapse. Thus, we investigated how the final length in our model compares to the optimal wiring  
284 length. The optimal length ( $L$ ) of dendrites in a plane scales with the square root of the number  
285 of synapses ( $N$ ) times the area over which the synapses are distributed ( $A$ ):  $L = \sqrt{NA/\pi}$  (*Cuntz*  
286 *et al., 2012*). In contrast, the length of a dendrite when synapses are connected randomly scales  
287 with the number of connected synapses times the average distance of two random points on a  
288 circle (*Uspensky, 1937*),  $L = N \frac{128}{45\pi} \sqrt{A/(2\pi)}$  which differs from the optimal result by a square root in  
289 the number of synapses. Using the convex hull that circumscribes the stabilized synapses as the  
290 area over which the synapses are distributed (*Figure 7b*), we compared the actual dendrite length  
291 with the optimal and the random wiring length (*Figure 7c*). We found that our simulated dendritic  
292 lengths are shorter than random wiring and longer than the theoretical optimal length.

293 We next wanted to know if the deviation from optimality might quantitatively match the one  
294 observed in real dendrites. To investigate this question, we reanalyzed a published dataset (*Cuntz*  
295 *et al., 2012*) containing the total lengths and the number of branch points of 13,112 dendrites  
296 pooled across 74 sources. When computing the fold change between the real and the optimal  
297 dendritic length in the dataset, we confirmed that real dendrites tend to be consistently larger  
298 than the theoretical optimum (*Figure 7d*). Interestingly, the fold change between the length of real  
299 dendrites and the theoretical optimum is similar to the fold change of our simulated dendrites and  
300 the theoretical optimum (*Figure 7e*). This deviation is expected given the heterogeneous structure  
301 of neuronal tissue that hampers diffusion of signaling molecules (*Nicholson et al., 2000; Motta*  
302 *et al., 2019*), which mirrors the fluctuations in activity-independent factors in our model. There-  
303 fore, activity-dependent dendrite growth produces morphologies with a total length close to the  
304 theoretically possible minimum.

## 305 **Discussion**

306 Dendrite growth and the formation, stabilization and removal of synapses during early develop-  
307 ment depend on various factors during development, including extrinsic factors such as growth  
308 cues, intrinsic molecular signaling, and correlated patterns of spontaneous activity, but the nature  
309 of these interactions and the implications for dendritic function throughout life remain largely un-  
310 explored. In this study, we proposed a mechanistic model for the growth and retraction of den-  
311 dritic branches as well as the formation and removal of synapses on these dendrites during de-  
312 velopment, based on the interaction of activity-independent cues from potential synaptic partners  
313 and local activity-dependent synaptic plasticity. Our model can simultaneously capture two main  
314 aspects of dendritic growth: produce dendritic morphologies and drive synaptic organization.



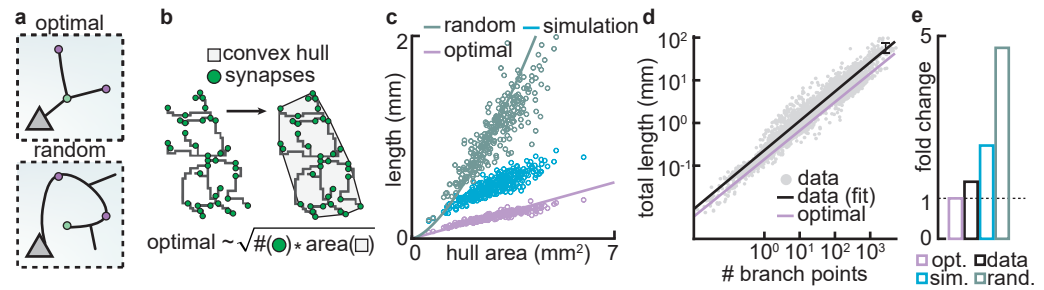

**Figure 7. Dendritic morphology approximately minimizes cable length.** (a) Schematic illustrating optimal (top) and random (bottom) wiring to connect a given set of synapses. (b) The convex hull of all synapses connected to a dendrite with the proportionality of optimal length (bottom). (c) Total tree length as a function of convex hull area in the optimal, simulated and random scenario. Each dot corresponds to one of 288 dendrites from 32 simulations. Lines correspond to analytic predictions for the average density across all simulations. (d) Total tree length against the number of branch points in log scale, both for data and theoretical optimum. Data extracted from (Cuntz *et al.*, 2012). (e) Total tree length in the data (black, average of  $n=13,112$ ), our simulations (blue, average of 288 dendrites from 32 simulations), and the random baseline (green, analytically computed) relative to theoretical optimum (pink, analytically computed).

### 315 Assumptions and predictions of the model

316 Some of the most prominent models of dendritic growth have focused on activity-independent  
 317 rules based on geometric or biophysical constraints (Cuntz *et al.*, 2010, 2012). Despite their im-  
 318 mense success in generating realistic dendritic morphologies, they leave open the question of  
 319 the underlying biological mechanisms. Other studies have implemented global activity-dependent  
 320 rules that require feedback signals from the soma or the axon (Ooyen *et al.*, 1995). Our model pro-  
 321 poses a simple and biologically plausible mechanism for the simultaneous dendritic growth and  
 322 synaptic organization based on activity-independent cues and local activity-dependent learning  
 323 rules, which cluster synaptic inputs according to functional preferences. Numerous experimen-  
 324 tal studies have demonstrated the importance of such local plasticity for the emergence of local  
 325 synaptic organization in the form of clusters as well as dendritic function (Hering and Sheng, 2001;  
 326 Lohmann *et al.*, 2002; Chen *et al.*, 2013; Niculescu *et al.*, 2018).

327 Our model makes some simplifying assumptions at the expense of mechanistic insights. For in-  
 328 stance, we model the generation of only stellate-like morphologies without the apical trunk. Many  
 329 types of neurons are characterized by stellate morphologies, especially in the somatosensory cor-  
 330 tex (Schubert *et al.*, 2003; Marques-Smith *et al.*, 2016; Scala *et al.*, 2019). Nonetheless, it would be  
 331 interesting to investigate if our model's mechanisms can be minimally modified to apply to the  
 332 generation of apical dendrites. Moreover, we generate our model dendrites in a two-dimensional,  
 333 flat sheet of cortex. We anticipate that the models can be straightforwardly extended to three  
 334 dimensions, but with additional computational cost. Although our assumptions may be too simpli-  
 335 fied to generate perfectly biologically realistic morphologies, the simple rules in our model capture  
 336 basic morphological features, such as the number of branches, the total length, and the Sholl anal-  
 337 ysis, with those of biological neurons reported in the literature.

338 A key advantage of our mechanistic model is the ability to predict the impact of early pertur-  
 339 bations on mature dendritic morphology, as the model allows us to independently investigate



340 activity-independent and -dependent influences on dendrite growth and synaptic organization.  
341 For example, three distinct phases of synapse development – overshoot, pruning, stabilization  
342 – and stable dendritic trees emerge naturally from the interactions between activity-independent  
343 signaling and the activity-dependent synaptic plasticity, without additional assumptions. The sta-  
344 bilization of dendritic morphologies in our model is enabled by the emergence of input selectivity,  
345 which implies local organization of synapses responsive to a particular correlated input pattern  
346 on the dendrite. Hence, our model explains how dendritic morphology can adapt to changes in  
347 the activity-dependent plasticity or the input statistics during development, as observed exper-  
348 imentally (*Cline and Haas, 2008; McAllister et al., 1995; Tyler and Pozzo-Miller, 2001*). Further,  
349 we provide a mechanistic explanation for the emergence of approximately optimal wiring length  
350 in mature dendrites. Thus, our model provides a new perspective on the interaction of activity-  
351 independent and -dependent factors influencing dendrite growth and suggests that the formation  
352 and activity-dependent stabilization vs. removal of synapses might exert powerful control over the  
353 growth process.

### 354 **Comparison with the synaptotrophic hypothesis**

355 The synaptotrophic hypothesis, originally proposed three decades ago (*Vaughn, 1989*), has pro-  
356 vided a useful framework for interpreting the effect of neural activity and synapse formation on  
357 dendrite development. Our proposed model is inspired by the synaptotrophic hypothesis but dif-  
358 fers from it in a few key aspects. (1) The synaptotrophic hypothesis postulates that synaptic activity  
359 is necessary for dendrite development (*Cline and Haas, 2008*). In contrast, our model contains an  
360 activity-independent component that allows dendrites to grow even in the absence of synaptic  
361 activity. Our model is thus consistent with the finding that even in the absence of neurotrans-  
362 mitter secretion connected neuronal circuits with morphologically defined synapses can still be  
363 formed (*Verhage et al., 2000*) and with computational (non-mechanistic) models that produce den-  
364 drites with many relevant morphological properties without relying on activity (*Cuntz, 2016*). (2)  
365 The synaptotrophic hypothesis does not specify the exact molecular factors underlying the infor-  
366 mation exchange pre- and postsynaptically. Informed by recent experiments that identify central  
367 molecular candidates (*Winnubst et al., 2015; Kleindienst et al., 2011; Niculescu et al., 2018; Lu*  
368 *et al., 2005*), our model proposes a concrete mechanistic implementation based on neurotrophic  
369 factors (*Kirchner and Gjorgjieva, 2021*). (3) The synaptotrophic hypothesis postulates that whether  
370 a potential synaptic contact is appropriate can be rapidly evaluated pre- and postsynaptically. In-  
371 spired by experiments (*Lohmann et al., 2002; Niell et al., 2004*), the fate of a synapse in our model is  
372 determined only within tens of minutes or hours after it is formed. This is due to the slow timescale  
373 of synaptic plasticity (*Figure 3d*).

### 374 **Relationship between dendritic form and function**

375 While previous studies focused on how dendritic morphology affects function, e.g. through nonlin-  
376 ear signal transformation (*Poirazi and Papoutsis, 2020*) or dynamic routing of signals (*Payeur et al.,*  
377 *2019*), we propose that dendrite form and function reciprocally shape each other during develop-  
378 ment. While the dendrite's morphology constrains the pool of available potential synapses, synap-

379 tic activity determines the dendritic branch's stability (Fig. 1). As a result, the dendritic tree self-  
380 organizes into an appropriate shape to support a limited number of functionally related synapses.  
381 These initial synaptic contacts might then serve as a scaffold around which additional, function-  
382 ally related synapses cluster to form the building blocks to support the powerful computations of  
383 mature dendrites (*Kirchner and Gjorgjieva, 2022*).

### 384 **Dynamics of dendritic development**

385 Here we focus on the early developmental period of highly dynamic dendritic growth and retraction.  
386 However, dendritic morphology remains remarkably stable in later development and throughout  
387 adulthood (*Richards et al., 2020; Castro et al., 2020; Koleske, 2013*). This stability is achieved de-  
388 spite substantial increases in overall size of the animal (*Richards et al., 2020; Castro et al., 2020*)  
389 and ongoing functional and structural plasticity of synapses (*Kleindienst et al., 2011; Winnubst*  
390 *et al., 2015; Kirchner and Gjorgjieva, 2021*). While it is still unclear how exactly synaptic organiza-  
391 tion is established during early development and how synapses are affected by the overall increase  
392 in dendrite size, somatic voltage responses to synaptic activity are largely independent of dendrite  
393 size (*Cuntz et al., 2021*). It has been shown that dendrite stability plays a crucial role in enabling the  
394 correct function of the adult brain and is disrupted in many psychiatric disorders and neurodegen-  
395 erative diseases. In particular, the release of BDNF, which is connected to synaptic activity, affects  
396 structural consolidation of dendrites and, thus, long-term stability (*Koleske, 2013*). Our mechanistic  
397 model allows us to perturb the balance of neurotrophic factors and investigate the effects on den-  
398 dritic development. For instance, our model predicts detrimental effects on dendrite stability as a  
399 result of extreme or non-existent input selectivity, providing insight into functional consequences  
400 of disrupted dendrite growth in neurodevelopmental disorders (*Johnston et al., 2016*).

### 401 **Interneurons and inhibitory synapses**

402 In addition to excitatory neurons and synapses that are the focus of this study, inhibitory interneu-  
403 rons and inhibitory synapses also play an important role in brain development (*Naskar et al., 2019*).  
404 Interneurons fall into genetically-distinct subtypes, which tend to target different portions of pyra-  
405 midal neurons (*Rudy et al., 2011; Kepecs and Fishell, 2014*). In particular, somatostatin-expressing  
406 (SST) interneurons preferentially target the dendrites of pyramidal neurons, while parvalbumin-  
407 expressing (PV) interneurons preferentially target the soma. Furthermore, the dendrites of in-  
408 hibitory neurons have a complex morphology that likely allows them to perform intricate transfor-  
409 mations of incoming signals (*Tzilivaki et al., 2019, 2021*). Investigating whether and how inhibitory  
410 interneurons and synapses might interact with excitatory ones during dendritic development is an  
411 exciting direction for future research.

412

413 In summary, by proposing a mechanistic model of dendritic development which combines activity-  
414 independent and -dependent components, our study explains several experimental findings and  
415 makes predictions about the factors underlying variable dendritic morphologies and synaptic orga-  
416 nization. Interestingly, the stable morphologies it generates are approximately optimal in terms of

417 wiring length and experimental data. Finally, our model provides the basis for future exploration of  
418 different learning rules and cell types which could differ across brain regions, species and healthy  
419 vs. disease states.

## 420 **Methods and Materials**

**Activity-independent synaptic signals.** In the synaptotrophic hypothesis, dendrite growth is directed towards potential synaptic partners. In our model, we capture this aspect by introducing a *growth field* of activity-independent synaptic signals,  $T(\mathbf{p})$ , over all positions  $\mathbf{p}$  in our sheet of cortex. This field contains point sources at the positions of potential synapses,  $\mathbf{p}_i$ , and evolves over time according to a diffusion equation,

$$T(\mathbf{p})^{t+1} = T(\mathbf{p})^t * D + \mu \sum_i \mathbf{p}_i + \sigma \mathbf{N}. \quad (2)$$

421 The growth field at time point  $t + 1$  is therefore given by the sum of the growth field at time  $t$   
422 convolved with a diffusion filter  $D$ , a constant input of size  $\mu$  from all potential synapses, which are  
423 currently not connected to a dendrite, as well as independent Gaussian noise,  $\mathbf{N}$ , with standard  
424 deviation  $\sigma$ . We chose a two dimensional Gaussian for the diffusion filter  $D$ , making the field  $T(\mathbf{p})$   
425 mathematically equivalent to a heat diffusion in two dimensions (**Figure 1–Figure Supplement 1**).

426 **Asynchronous dendrite growth and retraction.** Dendrite development critically depends on  
427 resources from the soma (**Ye et al., 2007**). Consequently, we modeled the growth of dendrites  
428 to depend on *scouting agents* that spread outward from the soma at regular time intervals,  $t_{scout}$ ,  
429 and that traverse the dendritic tree at speed  $v_{scout}$  (**Figure 1–Figure Supplement 2**). These scouting  
430 agents resemble actin-blobs that control dendrite growth (**Nithianandam and Chien, 2018**). When  
431 a scouting agent encounters a branch point, there is a 0.5 chance for it to continue in any direction.  
432 This means it can go in one direction, but it can also duplicate or disappear completely. We further  
433 model these scouting agents to detect the growth field's value – a scouting agent stops at a position  
434 on the dendrite where this field is locally maximal and marks this location for growth. The dendrite  
435 will then expand at the marked positions in the direction of the gradient of the growth field, and  
436 the scouting agent moves to this new position. If the dendrite grows to the location of a potential  
437 synapse, this synapse is then realized, and its initial weight is set to  $w_{init} = \frac{1}{2}$ . Two branches of  
438 the same neuron may never become adjacent; however, branches from other neurons may be  
439 crossed freely. If a scouting agent reaches the end of a branch without finding a local maximum of  
440 the growth field along its path, the scouting agent initiates the retraction of this branch. Depending  
441 on proximity, a branch then retracts up to the nearest stable synapse, the next branch point, or  
442 the soma. Because our simulations are a spatially discrete approximation of a biological flat sheet  
443 of cortex, we had to ensure that growth behaves appropriately in cases where the discretization  
444 scheme becomes relevant (**Figure 1–Figure Supplement 2**).

**Minimal plasticity model.** When a synapse  $k$  forms on the dendrite, its weight  $w_k$  evolves according to a previously proposed minimal plasticity model for interactions between synapses on developing dendrites (**Kirchner and Gjorgjieva, 2021**). This model can be linked to a full neurotrophin model that interprets the parameters in terms of the neurotrophic factors BDNF, proBDNF, and

the protease MMP9. In this model, the  $k$ -th synapse is stimulated within input event trains  $x_k$

$$x_k(t) = \int_0^\infty \sum_f \delta(s - s_k^f) (H(t - s) - H(t - x_{\text{dur}} - s)) ds \quad (3)$$

with events at times  $t_k^f$  and where the Heaviside step function  $H(t)$  is 0 when  $t$  is less than 0 and 1 when  $t$  is greater or equal than 0, so that events have duration  $x_{\text{dur}}$  (50 time steps). The minimal plasticity model consists of a synapse-specific presynaptic accumulator  $v_k$ ,

$$\tau_v \frac{dv_k}{dt} = -v_k(t) + \phi x_k(t), \quad (4)$$

and a postsynaptic accumulator  $u_k$  that averages over nearby synapses in a weighted and distance-dependent manner,

$$\tau_u \frac{du_k}{dt} = -u_k(t) + \sum_{l=1}^N s_{kl} w_l(t) x_l(t). \quad (5)$$

The multiplicative factor  $\phi$  is an MMP9 efficiency constant that determines how efficiently MMP9 converts proBDNF into BDNF per unit of time and the proximity variables  $s_{kl}$  between synapses  $k$  and  $l$  on the same dendrite are computed as  $s_{kl} = e^{-\frac{d_{kl}^2}{2\sigma_s^2}}$ , where  $\sigma_s$  determines the spatial postsynaptic calcium spread constant. The equation governing the weight development of  $w_k$  (**Equation 6**) is a Hebbian equation that directly combines the pre- and postsynaptic accumulator with an additional offset constant  $\rho$ ,

$$\tau_w \dot{w}_k = u_k(t)(v_k(t) + \rho), \quad (6)$$

445 with  $\rho = \frac{2\eta-1}{2(1-\eta)}$  and  $\tau_w = \tau_W \frac{1}{2(1-\eta)}$ . Here,  $\eta$  is the constitutive ratio of BDNF to proBDNF and  $\tau_W = 3000$  ms  
 446 This model is minimal in the sense that it cannot be reduced further without losing either the de-  
 447 pendence on correlation through the link to the BTDP rule, or the dependence on distance.

448 To model structural plasticity, we implemented a structural plasticity rule inspired by ref. (**Holt-**  
 449 **maat and Svoboda, 2009**) where each synapse whose efficacy falls below a fixed threshold  $W_{\text{thr}}$  is  
 450 pruned from the dendrite.

451 **Simulations and parameters.** For all simulations in this study, we distributed nine somata at  
 452 regular distances in a grid formation. We used 1500 potential synapses and divided them into five  
 453 groups of equal size, with each group receiving Poisson input with rate  $r_{\text{in}}$ . Therefore, all synapses  
 454 in the same group are perfectly correlated, while synapses in different groups are uncorrelated.

## 455 Acknowledgments

456 This work was supported by the Max Planck Society and the European Research Council (ERC) un-  
 457 der the European Union's Horizon 2020 research and innovation program (Grant agreement No.  
 458 804824).

## 459 Competing interests

460 No competing interests declared.

**Table 1.** Parameters of the minimal plasticity model (Kirchner and Gjorgjieva, 2021) and the synaptotrophic growth model.

| Parameter                                            | Variable                             | Value                                 |
|------------------------------------------------------|--------------------------------------|---------------------------------------|
| Synaptic efficacy time constant                      | $\tau_w$                             | 6000 time steps                       |
| Postsynaptic accumulator time constant               | $\tau_u$                             | 300 time steps                        |
| Presynaptic accumulator time constant                | $\tau_v$                             | 600 time steps                        |
| Constitutive percent of BDNF of total neurotrophins  | $\eta$                               | 45%                                   |
| MMP9 efficiency constant                             | $\phi$                               | $\frac{3}{50}$ per time step          |
| Heterosynaptic offset                                | $\rho$                               | $\rho = \frac{2\eta-1}{2(1-\eta)}$    |
| Minimal model synaptic efficacy time constant        | $\tau_w$                             | $\tau_w = \tau_w \frac{1}{2(1-\eta)}$ |
| Standard deviation of calcium spread                 | $\sigma_c$                           | 200 $\mu\text{m}$                     |
| Turnover threshold below which a synapse is replaced | $W_{\text{thr}}$                     | 0.02                                  |
| Firing rate of synapses                              | $r_{\text{in}}$                      | 0.116 $\text{min}^{-1}$               |
| Scout intervals and speed                            | $t_{\text{scout}}, v_{\text{scout}}$ | 10 min, 0.18 $\mu\text{m min}^{-1}$   |

## References

- 461 **Ackman JB**, Crair MC. Role of emergent neural activity in visual map development. *Current opinion in neuro-*  
462 *biology*. 2014; 24:166–175.
- 463 **Binley KE**, Ng WS, Tribble JR, Song B, Morgan JE. Sholl analysis: a quantitative comparison of semi-automated  
464 *methods*. *J Neurosci Methods*. 2014; 225:65–70.
- 465 **Bird A**, Cuntz H. Dissecting Sholl Analysis into Its Functional Components. *Cell Reports*. 2019; 27:3081–3096.
- 466 **Blankenship AG**, Feller MB. Mechanisms underlying spontaneous patterned activity in developing neural cir-  
467 *cuits*. *Nature Reviews Neuroscience*. 2010; 11(1):18–29.
- 468 **Campbell G**, Ramoa AS, Stryker MP, Shatz CJ. Dendritic development of retinal ganglion cells after prenatal  
469 *intracranial infusion of tetrodotoxin*. *Visual neuroscience*. 1997; 14(4):779–788.
- 470 **Castro AF**, Baltruschat L, Stürner T, Bahrami A, Jedlicka P, Tavosanis G, Cuntz H. Achieving functional neuronal  
471 *dendrite structure through sequential stochastic growth and retraction*. *Elife*. 2020; 9:e60920.
- 472 **Chen TW**, Wardill T, Sun Y, R PS, Renninger SL, Baohan A, Schreier ER, Kerr RA, Orger MB, Jayaraman V, Looger  
473 *LL, Svoboda K, Kim DS. Ultrasensitive fluorescent proteins for imaging neuronal activity*. *Nature*. 2013;  
474 *499:295–300*.
- 475 **Chklovskii DB**, Schikorski T, Stevens CF. Wiring optimization in cortical circuits. *Neuron*. 2002; 34(3):341–347.
- 476 **Cijssouw T**, Weber JP, Broeke JH, Broek JA, Schut D, Kroon T, Saarloos I, Verhage M, Toonen RF. Munc18-1  
477 *redistributes in nerve terminals in an activity-and PKC-dependent manner*. *Journal of cell biology*. 2014;  
478 *204(5):759–775*.
- 479 **Cline H**, Haas K. The regulation of dendritic arbor development and plasticity by glutamatergic synaptic input:  
480 *a review of the synaptotrophic hypothesis*. *The Journal of physiology*. 2008; 586(6):1509–1517.
- 481 **Cline HT**. Experience-dependent dendritic arbor development. In: *Dendrites: Development and Disease* Springer  
482 *Japan*; 2016.p. 295–315. doi: 10.1007/978-4-431-56050-013.
- 483 **Crair MC**. Neuronal activity during development: permissive or instructive? *Current opinion in neurobiology*.  
484 *1999; 9(1):88–93*.

- 486 **Cuntz H.** Modeling dendrite shape. In: *Dendrites* Oxford University Press; 2016.p. 487–504. doi:  
487 [10.1093/acprof:oso/9780198745273.003.0017](https://doi.org/10.1093/acprof:oso/9780198745273.003.0017).
- 488 **Cuntz H,** Bird AD, Mittag M, Beining M, Schneider M, Mediavilla L, Hoffmann FZ, Deller T, Jedlicka P. A  
489 general principle of dendritic constancy: A neuron's size-and shape-invariant excitability. *Neuron*. 2021;  
490 109(22):3647–3662.
- 491 **Cuntz H,** Forstner F, Borst A, Häusser M. One Rule to Grow Them All: A General Theory of Neuronal Branch-  
492 ing and Its Practical Application. *PLoS Computational Biology*. 2010 aug; 6(8):e1000877. doi: [10.1371/jour-  
493 nal.pcbi.1000877](https://doi.org/10.1371/journal.pcbi.1000877).
- 494 **Cuntz H,** Mathy A, Häusser M. A scaling law derived from optimal dendritic wiring. *Proceedings of the National  
495 Academy of Sciences*. 2012; 109(27):11014–11018.
- 496 **Gouwens N,** Sorensen S, Baftizadeh F, Budzillo A, Lee B, Jarsky T, Alfiler L, Arkhipov A, Baker K, Barkan E, Berry K,  
497 Bertagnolli D, Bickley K, Bomben J, Braun T, Brouner K, Casper T, Crichton K, Daigle T, Dalley R, et al. Toward  
498 an Integrated Classification of Cell Types: Morphoelectric and Transcriptomic Characterization of Individual  
499 GABAergic Cortical Neurons. *SSRN Electronic Journal*. 2020 feb; p. 2020.02.03.932244. [https://doi.org/10.  
500 1101/2020.02.03.932244](https://doi.org/10.1101/2020.02.03.932244), doi: [10.1101/2020.02.03.932244](https://doi.org/10.1101/2020.02.03.932244).
- 501 **Grueber WB,** Sagasti A. Self-avoidance and tiling: mechanisms of dendrite and axon spacing. *Cold Spring  
502 Harbor perspectives in biology*. 2010; 2(9):a001750.
- 503 **Haas K,** Li J, Cline HT. AMPA receptors regulate experience-dependent dendritic arbor growth in vivo. *Proceed-  
504 ings of the National Academy of Sciences of the United States of America*. 2006 aug; 103(32):12127–12131.  
505 doi: [10.1073/pnas.0602670103](https://doi.org/10.1073/pnas.0602670103).
- 506 **Hering H,** Sheng M. Dendritic spines: structure, dynamics and regulation. *Nature Reviews Neuroscience*. 2001;  
507 2(12):880–888.
- 508 **Holtmaat A,** Svoboda K. Experience-dependent structural synaptic plasticity in the mammalian brain. *Nature  
509 Reviews Neuroscience*. 2009; 10(9):647.
- 510 **Holtmaat AJ,** Trachtenberg JT, Wilbrecht L, Shepherd GM, Zhang X, Knott GW, Svoboda K. Transient and per-  
511 sistent dendritic spines in the neocortex in vivo. *Neuron*. 2005; 45(2):279–291.
- 512 **Iacaruso FM,** Gasler IT, Hofer SB. Synaptic organization of visual space in primary visual cortex. *Nature*. 2017;  
513 547(7664):449–452.
- 514 **Je HS,** Yang F, Ji Y, Nagappan G, Hempstead BL, Lu B. Role of pro-brain-derived neurotrophic factor (proBDNF)  
515 to mature BDNF conversion in activity-dependent competition at developing neuromuscular synapses. *Pro-  
516 ceedings of the National Academy of Sciences*. 2012; 109(39):15924–15929. doi: [10.1073/pnas.1207767109](https://doi.org/10.1073/pnas.1207767109).
- 517 **Johnston D,** Frick A, Poolos NP. Dendrites and disease. In: *Dendrites* Oxford University Press; 2016.p. 677–702.  
518 doi: [10.1093/acprof:oso/9780198745273.003.0024](https://doi.org/10.1093/acprof:oso/9780198745273.003.0024).
- 519 **Kepecs A,** Fishell G. Interneuron cell types: fit to form and formed to fit. *Nature*. 2014; 505(7483):318.
- 520 **Kirchner JH,** Gjorgjieva J. Emergence of local and global synaptic organization on cortical dendrites. *Nature  
521 Communications*. 2021; 12(1):1–18.
- 522 **Kirchner JH,** Gjorgjieva J. Emergence of synaptic organization and computation in dendrite. *Neuroforum*. 2022;  
523 28(1):21–30.
- 524 **Kleindienst T,** Winnubst J, Roth-Alpermann C, Bonhoeffer T, Lohmann C. Activity-dependent clustering of func-  
525 tional synaptic inputs on developing hippocampal dendrites. *Neuron*. 2011; 72(6):1012–1024.

- 526 **Kliemann W.** A stochastic dynamical model for the characterization of the geometrical structure of dendritic  
527 processes. *Bulletin of Mathematical Biology.* 1987; 49(2):135–152. doi: 10.1007/BF02459695.
- 528 **Koene RA,** Tijms B, Van Hees P, Postma F, De Ridder A, Ramakers GJA, Van Pelt J, Van Ooyen A. NETMORPH: A  
529 framework for the stochastic generation of large scale neuronal networks with realistic neuron morphologies.  
530 *Neuroinformatics.* 2009 sep; 7(3):195–210. doi: 10.1007/s12021-009-9052-3.
- 531 **Koleske AJ.** Molecular mechanisms of dendrite stability. *Nature Reviews Neuroscience.* 2013; 14(8):536–550.
- 532 **Koshimizu H,** Kiyosue K, Hara T, Hazama S, Suzuki S, Uegaki K, Nagappan G, Zaitsev E, Hirokawa T, Tatsu Y,  
533 et al. Multiple functions of precursor BDNF to CNS neurons: negative regulation of neurite growth, spine  
534 formation and cell survival. *Molecular brain.* 2009; 2(1):1–19.
- 535 **Kroon T,** van Hugte E, van Linge L, Mansvelter HD, Meredith RM. Early postnatal development of pyramidal  
536 neurons across layers of the mouse medial prefrontal cortex. *Scientific reports.* 2019; 9(1):1–16.
- 537 **Larkman A,** Mason A. Correlations Between Morphology and Electrophysiology of Pyramidal Neurons in Slices  
538 of Rat Visual Cortex. I. Establishment of Cell Classes; 1990.
- 539 **Leighton AH,** Lohmann C. The wiring of developing sensory circuits—from patterned spontaneous activity to  
540 synaptic plasticity mechanisms. *Frontiers in neural circuits.* 2016; 10:71.
- 541 **Lohmann C,** Myhr KL, Wong ROL. Transmitter-evoked local calcium release stabilizes developing dendrites.  
542 *Nature.* 2002 jul; 418(6894):177–181. doi: 10.1038/nature00850.
- 543 **Lu B,** Pang PT, Woo NH. The Yin and Yang of neurotrophin action. *Nature Reviews Neuroscience.* 2005; 6(8):603–  
544 614.
- 545 **Luczak A.** Spatial embedding of neuronal trees modeled by diffusive growth. *Journal of Neuroscience Methods.*  
546 2006 oct; 157(1):132–141. doi: 10.1016/j.jneumeth.2006.03.024.
- 547 **Marques-Smith A,** Lyngholm D, Kaufmann AK, Stacey JA, Hoerder-Suabedissen A, Becker EBE, Wilson MC, Mol-  
548 nár Z, Butt SJB. A Transient Translaminar GABAergic Interneuron Circuit Connects Thalamocortical Recipient  
549 Layers in Neonatal Somatosensory Cortex. *Neuron.* 2016; 89(3):536–549.
- 550 **McAllister AK,** Lo DC, Katz LC. Neurotrophins regulate dendritic growth in developing visual cortex. *Neuron.*  
551 1995; 15(4):791–803.
- 552 **Motta A,** Berning M, Boergens KM, Staffler B, Beining M, Loomba S, Hennig P, Wissler H, Helmstaedter M. Dense  
553 connectomic reconstruction in layer 4 of the somatosensory cortex. *Science.* 2019; 366(6469):eaay3134.
- 554 **Naskar S,** Narducci R, Balzani E, Cwetsch AW, Tucci V, Cancedda L. The development of synaptic transmission  
555 is time-locked to early social behaviors in rats. *Nature Communications.* 2019; 10(1):1–12.
- 556 **Nicholson C,** Chen KC, Hrabětová S, Tao L. Diffusion of molecules in brain extracellular space: theory and  
557 experiment. *Progress in brain research.* 2000; 125:129–154.
- 558 **Niculescu D,** Michaelsen-Preusse K, Güner Ü, van Dorland R, Wierenga CJ, Lohmann C. A BDNF-Mediated  
559 Push-Pull Plasticity Mechanism for Synaptic Clustering. *Cell reports.* 2018; 24(8):2063–2074.
- 560 **Niell CM,** Meyer MP, Smith SJ. In vivo imaging of synapse formation on a growing dendritic arbor. *Nature*  
561 *Neuroscience.* 2004 mar; 7(3):254–260. doi: 10.1038/nn1191.
- 562 **Nithianandam V,** Chien CT. Actin blobs prefigure dendrite branching sites. *Journal of Cell Biology.* 2018;  
563 217(10):3731–3746.



- 564 **Ohki K**, Chung S, Ch'ng YH, Kara P, Reid RC. Functional imaging with cellular resolution reveals precise micro-  
565 architecture in visual cortex. *Nature*. 2005; 433(7026):597–603.
- 566 **Ooyen AV**, Van Pelt J, Corner MA. Implications of activity dependent neurite outgrowth for neuronal morphol-  
567 ogy and network development. *Journal of Theoretical Biology*. 1995; 172(1):63–82.
- 568 **Park J**, Papoutsi A, Ash RT, Marin MA, Poirazi P, Smirnakis SM. Contribution of apical and basal dendrites to  
569 orientation encoding in mouse V1 L2/3 pyramidal neurons. *Nature Communications*. 2019 dec; 10(1):1–11.  
570 doi: 10.1038/s41467-019-13029-0.
- 571 **Payeur A**, Béique JC, Naud R. Classes of dendritic information processing. *Current opinion in neurobiology*.  
572 2019; 58:78–85.
- 573 **Poirazi P**, Brannon T, Mel BW. Pyramidal neuron as two-layer neural network. *Neuron*. 2003 mar; 37(6):989–  
574 999. doi: 10.1016/S0896-6273(03)00149-1.
- 575 **Poirazi P**, Mel BW. Impact of active dendrites and structural plasticity on the memory capacity of neural tissue.  
576 *Neuron*. 2001; 29(3):779–796. doi: 10.1016/S0896-6273(01)00252-5.
- 577 **Poirazi P**, Papoutsi A. Illuminating dendritic function with computational models. *Nature Reviews Neuro-*  
578 *science*. 2020; 21(6):303–321.
- 579 **Polleux F**, Ghosh A, Grueber WB. Molecular determinants of dendrite and spine development. In: *Dendrites*  
580 Oxford University Press; 2016.p. 95–128. doi: 10.1093/acprof:oso/9780198745273.003.0004.
- 581 **Puram SV**, Bonni A. Cell-intrinsic drivers of dendrite morphogenesis. *Development*. 2013; 140(23):4657–4671.
- 582 **Riccomagno MM**, Kolodkin AL. Sculpting Neural Circuits by Axon and Dendrite Pruning. *Annual Review of Cell*  
583 *and Developmental Biology*. 2015 nov; 31(1):779–805. doi: 10.1146/annurev-cellbio-100913-013038.
- 584 **Richards SEV**, Moore AR, Nam AY, Saxena S, Paradis S, van Hooser SD. Experience-dependent development  
585 of dendritic arbors in mouse visual cortex. *Journal of Neuroscience*. 2020 aug; 40(34):6536–6556. doi:  
586 10.1523/JNEUROSCI.2910-19.2020.
- 587 **Rossi LF**, Harris K, Carandini M. Excitatory and inhibitory intracortical circuits for orientation and direction  
588 selectivity. *bioRxiv*. 2019; p. 556795.
- 589 **Rudy B**, Fishell G, Lee S, Hjerling-Leffler J. Three groups of interneurons account for nearly 100% of neocortical  
590 GABAergic neurons. *Developmental neurobiology*. 2011; 71(1):45–61.
- 591 **Sakai J**. How synaptic pruning shapes neural wiring during development and, possibly, in disease. *Proceedings*  
592 *of the National Academy of Sciences of the United States of America*. 2020 jul; 117(28):16096–16099. doi:  
593 10.1073/pnas.2010281117.
- 594 **Scala F**, Kobak D, Shan S, Bernaerts Y, Laturus S, Cadwell CR, Hartmanis L, Froudarakis E, Castro JR, Tan ZH,  
595 Papadopoulos S, Patel SS, Sandberg R, Berens P, Jiang X, Tolias AS. Layer 4 of mouse neocortex differs in cell  
596 types and circuit organization between sensory areas. *Nature Communications*. 2019; 10(1):4174.
- 597 **Scala F**, Kobak D, Bernabucci M, Bernaerts Y, Cadwell CR, Castro JR, Hartmanis L, Jiang X, Laturus S, Miranda E,  
598 Mulherkar S, Tan ZH, Yao Z, Zeng H, Sandberg R, Berens P, Tolias AS. Phenotypic variation within and across  
599 transcriptomic cell types in mouse motor cortex. *Nature*. 2021; 598:144—150.
- 600 **Scholl B**, Wilson DE, Fitzpatrick D. Local order within global disorder: synaptic architecture of visual space.  
601 *Neuron*. 2017; 96(5):1127–1138.
- 602 **Schubert D**, Kötter R, Zilles K, Luhmann HJ, Staiger JF. Cell type-specific circuits of cortical layer IV spiny neurons.  
603 *Journal of Neuroscience*. 2003; 23(7):2961—2970.

- 604 **Sholl DA**. Dendritic organization in the neurons of the visual and motor cortices of the cat. *J Anat.* 1953;  
605 87:387–406.
- 606 **Sretavan DW**, Shatz CJ, Stryker MP. Modification of retinal ganglion cell axon morphology by prenatal infusion  
607 of tetrodotoxin. *Nature.* 1988; 336(6198):468–471. doi: 10.1038/336468a0.
- 608 **Stepanyants A**, Chklovskii DB. Neurogeometry and potential synaptic connectivity. *Trends in neurosciences.*  
609 2005; 28(7):387–394.
- 610 **Torben-Nielsen B**, De Schutter E. Context-aware modeling of neuronal morphologies. *Frontiers in Neu-*  
611 *roanatomy.* 2014 sep; 8(SEP):92. doi: 10.3389/fnana.2014.00092.
- 612 **Tyler WJ**, Pozzo-Miller LD. BDNF enhances quantal neurotransmitter release and increases the number of  
613 docked vesicles at the active zones of hippocampal excitatory synapses. *Journal of Neuroscience.* 2001;  
614 21(12):4249–4258.
- 615 **Tzilivaki A**, Kastellakis G, Poirazi P. Challenging the point neuron dogma: FS basket cells as 2-stage nonlinear  
616 integrators. *Nature Communications.* 2019; 10(1):1–14.
- 617 **Tzilivaki A**, Kastellakis G, Schmitz D, Poirazi P. GABAergic interneurons with nonlinear dendrites: from neuronal  
618 computations to memory engrams. *Neuroscience.* 2021; .
- 619 **Ultanir SK**, Kim JE, Hall BJ, Deerinck T, Ellisman M, Ghosh A. Regulation of spine morphology and spine density  
620 by NMDA receptor signaling in vivo. *Proceedings of the National Academy of Sciences.* 2007; 104(49):19553–  
621 19558.
- 622 **Uspensky JV**. Introduction to mathematical probability. *Proceedings of the National Academy of Sciences.*  
623 1937; .
- 624 **Vaughn JE**. Review: Fine structure of synaptogenesis in the vertebrate central nervous system. *Synapse.* 1989  
625 jan; 3(3):255–285. doi: 10.1002/syn.890030312.
- 626 **van Veen M**, van Pelt J. A model for outgrowth of branching neurites. *Journal of Theoretical Biology.* 1992 nov;  
627 159(1):1–23. doi: 10.1016/S0022-5193(05)80764-7.
- 628 **Verhage M**, Maia AS, Plomp JJ, Brussaard AB, Heeroma JH, Vermeer H, Toonen RF, Hammer RE, van den TK,  
629 Berg, et al. Synaptic assembly of the brain in the absence of neurotransmitter secretion. *Science.* 2000;  
630 287(5454):864–869.
- 631 **Winnubst J**, Cheyne JE, Niculescu D, Lohmann C. Spontaneous activity drives local synaptic plasticity in vivo.  
632 *Neuron.* 2015; 87(2):399–410.
- 633 **Yang J**, Harte-Hargrove LC, Siao CJ, Marinic T, Clarke R, Ma Q, Jing D, LaFrancois JJ, Bath KG, Mark W, et al.  
634 proBDNF negatively regulates neuronal remodeling, synaptic transmission, and synaptic plasticity in hip-  
635 pocampus. *Cell reports.* 2014; 7(3):796–806.
- 636 **Ye B**, Zhang Y, Song W, Younger SH, Jan LY, Jan YN. Growing dendrites and axons differ in their reliance on the  
637 secretory pathway. *Cell.* 2007; 130(4):717–729.

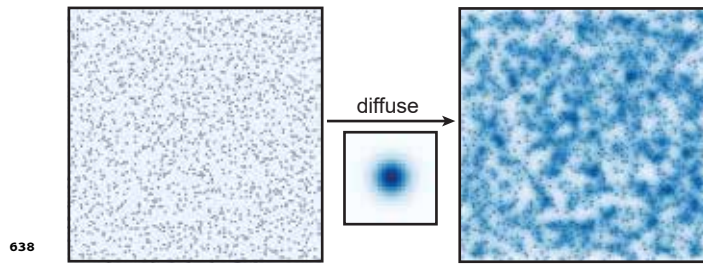

**Figure 1-Figure supplement 1. The growth field is similar to two-dimensional heat diffusion.**

By iteratively convolving the potential synapses in the growth field with a Gaussian filter, the growth field reaches a steady-state that resembles a two-dimensional heat diffusion with point sources. Over time, individual point sources disappear and reappear to mimic when the corresponding synapses are connected or pruned from the dendrite.

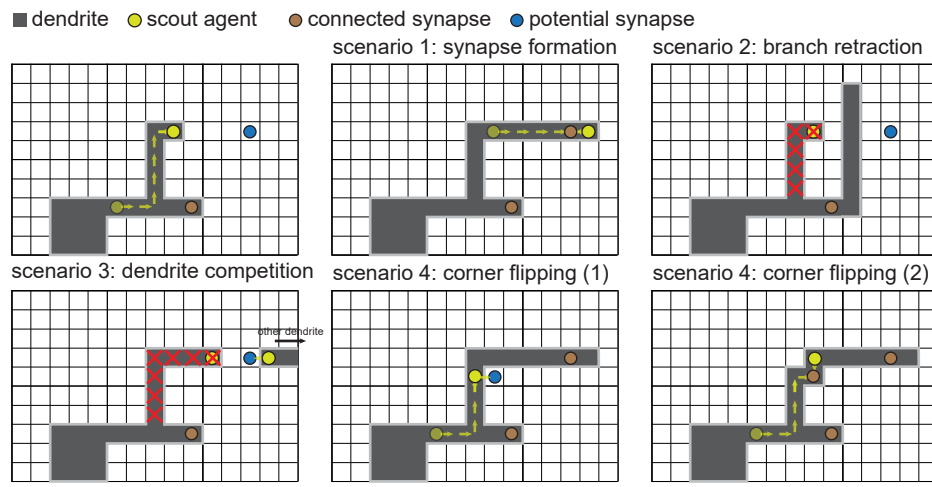

**Figure 1-Figure supplement 2. Four scenarios of asynchronous dendritic growth can be modeled as a scout agent representing the tip of a dendrite exploring a two-dimensional grid. A scout agent (yellow dot) has reached the location of a potential synapse (blue dot). Scenario 1: The scout agent will extend the dendrite and form a new synapse if nothing else happens. Scenario 2: To prevent overlap, if a second branch from the same dendrite blocks the path to the potential synapse, the original branch retracts. Scenario 3: If a branch from another dendrite reaches the potential synapse first, the original branch retracts. Scenario 4: If a new potential synapse becomes available adjacent to the dendrite (1) so that growth is not possible (since the branch cannot form immediately adjacent to two other parts of the dendrite), the corner flips (2), and the synapse forms.**

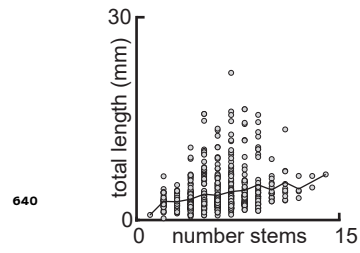

**Figure 6–Figure supplement 1. Total tree length increases with the number of stems.** Average (solid black) and individual (gray circles) total tree lengths as a function of the number of stems.  $N = 701$ . Data from the Allen Cell Types Database (2015).
